# Supplementary material for: Receptor modelling of both particle composition and size distribution from a background site in London, UK – a two-step approach
Source: Copernicus journal article supplement (doi:10.5194/acp-19-4863-2019), 2019-04-11
Supplement: Supplementary file 1 [file acp-19-4863-2019-supplement.pdf]

Supplement of Atmos. Chem. Phys., 19, 4863–4876, 2019  
<https://doi.org/10.5194/acp-19-4863-2019-supplement>  
© Author(s) 2019. This work is distributed under  
the Creative Commons Attribution 4.0 License.

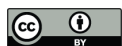

*Supplement of*

## **Receptor modelling of both particle composition and size distribution from a background site in London, UK – a two-step approach**

**David C. S. Beddows and Roy M. Harrison**

*Correspondence to:* David C. S. Beddows ([d.c.beddows@bham.ac.uk](mailto:d.c.beddows@bham.ac.uk))

The copyright of individual parts of the supplement might differ from the CC BY 4.0 License.

39 **Table S1.** Setup of TSI SMPS.

40

| EC 3080                          |                                       |
|----------------------------------|---------------------------------------|
| Neutraliser                      | Kr-85 radioactive source              |
| Drier                            | ✓ EUSAAR/ACTRIS Drier                 |
| DMA                              | TSI 3081 long DMA                     |
| Aerosol Flow                     | 0.3 lpm                               |
| Sheath Flow                      | 3.0 lpm                               |
| Impactor Type                    | 0.0508 cm                             |
| HV Polarity                      | Neg                                   |
| AIM version                      | 9.0                                   |
| Scans per Sample                 | 6                                     |
| Number of Samples                | 1                                     |
| Total Sample Time                | 14 min 0 sec                          |
| Multiple charge                  | ✓                                     |
| Diffusion loss correction        | ✓                                     |
| Particle Density                 | 1.2 g/cc                              |
| Gas Density                      | 0.0012 g/cc                           |
| Nano Aggregate Mobility Analysis | ✗                                     |
| CPC3775                          |                                       |
| Inlet flow                       | 0.3 lpm                               |
| Data Coverage                    | 72.5 % over the 2 years 2011/2012     |
| Service and Calibration Date     | February 2011 and February/March 2012 |

41

42

43 **Table S2.** Miscellaneous PMF-PMF details for the PM<sub>10</sub>-NSD data set.

44

| INPUT DATA                                    | ( <sup>1</sup> G <sub>1</sub> ... <sup>1</sup> G <sub>6</sub> , NSD <sub>1</sub> <sup>16nm</sup> ...NSD <sub>52</sub> <sup>640nm</sup> ) |
|-----------------------------------------------|------------------------------------------------------------------------------------------------------------------------------------------|
| <i>Input Settings</i>                         |                                                                                                                                          |
| PMF2 version number                           | 4.2                                                                                                                                      |
| Number of Factors                             | 6                                                                                                                                        |
| FPEAK                                         | 0.1                                                                                                                                      |
| Input dimensions: Row x Columns               | 590 x 58                                                                                                                                 |
| Number of Repeats                             | 1                                                                                                                                        |
| Outlier Distance                              | 4                                                                                                                                        |
| Robust Analysis                               | ✓                                                                                                                                        |
| Error Model                                   | -12                                                                                                                                      |
| Seed                                          | 3                                                                                                                                        |
| Initially Skipped                             | 0                                                                                                                                        |
| Uncertainty Matrices T/U/V                    | ✓/✗/✗                                                                                                                                    |
| Normalization of factor vectors before output | None                                                                                                                                     |
| Optional parameter lines                      | missingneg 10                                                                                                                            |
| <i>Output values</i>                          |                                                                                                                                          |
| Q in the robust mode                          | 30333                                                                                                                                    |
| Q when not down weighting outliers            | 32568                                                                                                                                    |
| POS-Outlier limit (4.0) exceeded by           | 221 positive residuals                                                                                                                   |
| NEG-Outlier limit (4.0) exceeded by           | 38 negative residuals                                                                                                                    |

45

46 **Table S3.** Miscellaneous PMF-PMF details for the NSD-PM<sub>10</sub> data set.

47

| INPUT DATA                                    | ( <sup>1</sup> G <sub>1</sub> ... <sup>1</sup> G <sub>4</sub> ], PM <sub>10</sub> [PM, PM <sub>carbon</sub> , PM <sub>ions</sub> , PM <sub>metals</sub> ]). |
|-----------------------------------------------|-------------------------------------------------------------------------------------------------------------------------------------------------------------|
| <i>Input Settings</i>                         |                                                                                                                                                             |
| PMF2 version number                           | 4.2                                                                                                                                                         |
| Number of Factors                             | 4                                                                                                                                                           |
| FPEAK                                         | 0.1                                                                                                                                                         |
| Input dimensions: Row x Columns               | 591 x 34                                                                                                                                                    |
| Number of Repeats                             | 1                                                                                                                                                           |
| Outlier Distance                              | 4                                                                                                                                                           |
| Robust Analysis                               | ✓                                                                                                                                                           |
| Error Model                                   | -12                                                                                                                                                         |
| Seed                                          | 3                                                                                                                                                           |
| Initially Skipped                             | 0                                                                                                                                                           |
| Uncertainty Matrices T/U/V                    | ✓/✗/✗                                                                                                                                                       |
| Normalization of factor vectors before output | None                                                                                                                                                        |
| Optional parameter lines                      | missingneg 10                                                                                                                                               |
| <i>Output values</i>                          |                                                                                                                                                             |
| Q in the robust mode                          | 17652                                                                                                                                                       |
| Q when not down weighting outliers            | 18089                                                                                                                                                       |
| POS-Outlier limit ( 4.0) exceeded by          | 19 positive residuals                                                                                                                                       |
| NEG-Outlier limit ( 4.0) exceeded by          | 3 negative residuals                                                                                                                                        |

48

49 **Table S4.** Summary of the regression results, comparing <sup>1</sup>G<sub>k</sub> with <sup>2</sup>G<sub>k</sub> for k in 1 to 6.

50

|               |                                                            | const in <sup>1</sup> G <sub>k</sub> = const x <sup>2</sup> G <sub>k</sub> | R <sup>2</sup> |
|---------------|------------------------------------------------------------|----------------------------------------------------------------------------|----------------|
| Diffuse Urban | <sup>1</sup> G <sub>1</sub> vs <sup>2</sup> G <sub>1</sub> | 1.2                                                                        | 0.72           |
| Marine        | <sup>1</sup> G <sub>2</sub> vs <sup>2</sup> G <sub>2</sub> | 0.73                                                                       | 0.94           |
| Secondary     | <sup>1</sup> G <sub>3</sub> vs <sup>2</sup> G <sub>3</sub> | 0.56                                                                       | 0.71           |
| NET & Crustal | <sup>1</sup> G <sub>4</sub> vs <sup>2</sup> G <sub>4</sub> | 0.54                                                                       | 0.96           |
| Fuel Oil      | <sup>1</sup> G <sub>5</sub> vs <sup>2</sup> G <sub>5</sub> | 2.9                                                                        | 0.41           |
| Traffic       | <sup>1</sup> G <sub>6</sub> vs <sup>2</sup> G <sub>6</sub> | 15.5                                                                       | 0.40           |

51

52

53

54

55

56

57

58

59

60

|                     |           | <b>G Time Series from Step 1</b> |           |           |           |           |           | <b>Number Size Distribution (nm)</b> |      |      |   |     |
|---------------------|-----------|----------------------------------|-----------|-----------|-----------|-----------|-----------|--------------------------------------|------|------|---|-----|
|                     |           | ${}^1G_1$                        | ${}^1G_2$ | ${}^1G_3$ | ${}^1G_4$ | ${}^1G_5$ | ${}^1G_6$ | 16.6                                 | 17.8 | 19.2 | ⋮ | 604 |
| Factors from Step 2 | ${}^2F_1$ | 0                                | $fkey_1$  | $fkey_1$  | $fkey_1$  | $fkey_1$  | $fkey_1$  | 0                                    | 0    | 0    |   | 0   |
|                     | ${}^2F_2$ | $fkey_1$                         | 0         | $fkey_1$  | $fkey_1$  | $fkey_1$  | $fkey_1$  | 0                                    | 0    | 0    |   | 0   |
|                     | ${}^2F_3$ | $fkey_1$                         | $fkey_1$  | 0         | $fkey_1$  | $fkey_1$  | $fkey_1$  | 0                                    | 0    | 0    |   | 0   |
|                     | ${}^2F_4$ | $fkey_1$                         | $fkey_1$  | $fkey_1$  | 0         | $fkey_1$  | $fkey_1$  | 0                                    | 0    | 0    |   | 0   |
|                     | ${}^2F_5$ | $fkey_1$                         | $fkey_1$  | $fkey_1$  | $fkey_1$  | 0         | $fkey_1$  | 0                                    | 0    | 0    |   | 0   |
|                     | ${}^2F_6$ | $fkey_1$                         | $fkey_1$  | $fkey_1$  | $fkey_1$  | $fkey_1$  | 0         | 0                                    | 0    | 0    |   | 0   |
|                     |           | ${}^1G_1$                        | ${}^1G_2$ | ${}^1G_3$ | ${}^1G_4$ | ${}^1G_5$ | ${}^1G_6$ | 16.6                                 | 17.8 | 19.2 | ⋮ | 604 |
| Factors from Step 2 | ${}^2F_1$ | 0                                | $fkey_1$  | $fkey_1$  | $fkey_1$  | $fkey_1$  | $fkey_1$  | 0                                    | 0    | 0    |   | 0   |
|                     | ${}^2F_2$ | $fkey_1$                         | 0         | $fkey_1$  | $fkey_1$  | $fkey_1$  | $fkey_1$  | 0                                    | 0    | 0    |   | 0   |
|                     | ${}^2F_3$ | $fkey_1$                         | $fkey_1$  | 0         | $fkey_1$  | $fkey_1$  | $fkey_1$  | 0                                    | 0    | 0    |   | 0   |
|                     | ${}^2F_4$ | $fkey_1$                         | $fkey_1$  | $fkey_1$  | 0         | $fkey_1$  | $fkey_1$  | 0                                    | 0    | 0    |   | 0   |
|                     | ${}^2F_5$ | $fkey_1$                         | $fkey_1$  | $fkey_1$  | $fkey_1$  | 0         | $fkey_1$  | 0                                    | 0    | 0    |   | 0   |
|                     | ${}^2F_6$ | $fkey_1$                         | $fkey_1$  | $fkey_1$  | $fkey_1$  | $fkey_1$  | 0         | 0                                    | 0    | 0    |   | 0   |
|                     | ${}^2F_7$ | $fkey_2$                         | $fkey_2$  | $fkey_2$  | $fkey_2$  | $fkey_2$  | $fkey_2$  | 0                                    | 0    | 0    |   | 0   |

**Figure S1.** Entries in the **FKEY** matrix used in step 2 of the PMF-PMF analysis using (a) 6 factors and (b) 7 factors. An extremely strong value of 24 was chosen for  $fkey_1$  and 20 for  $fkey_2$ .

61  
62  
63

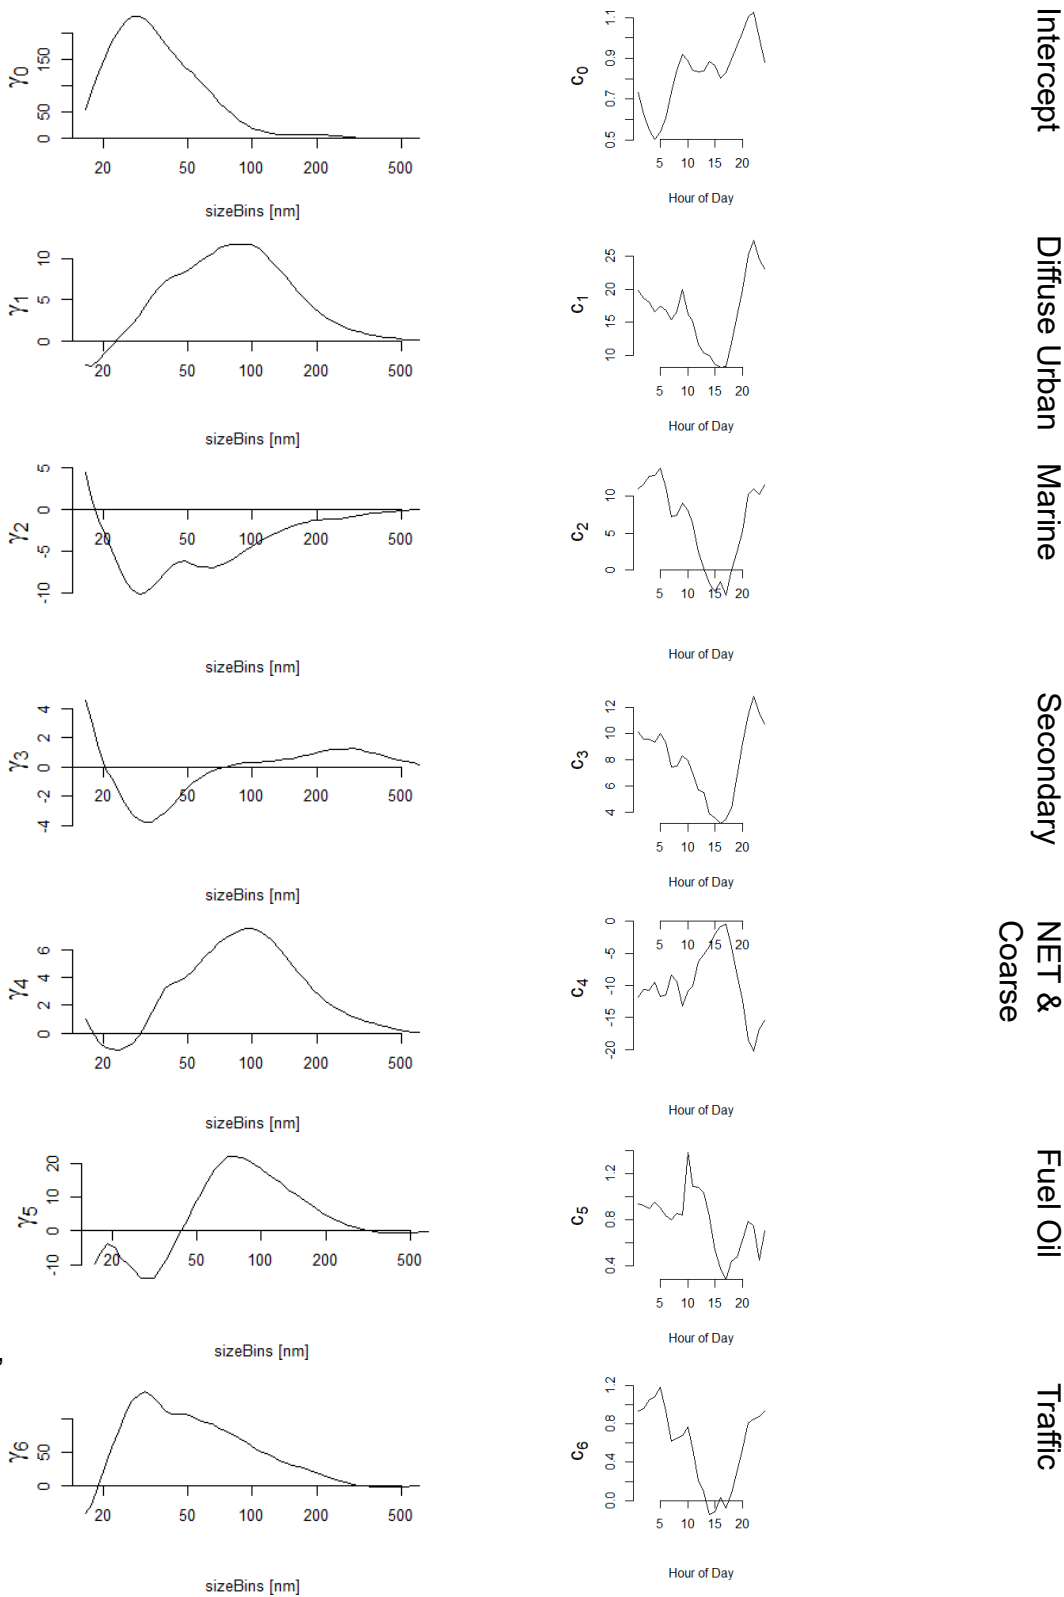

**Figure S2.** Daily regression source profiles ( $\gamma_k$  vs  $d_p$ ) obtained from regressing the NSD data against  ${}^1\mathbf{G}_k$  (left hand panels) as in equation 4 and diurnal trends of the fit parameter  $c_k$  resulting from the fit of the daily regression source profiles to the hourly NSD data.

64  
65

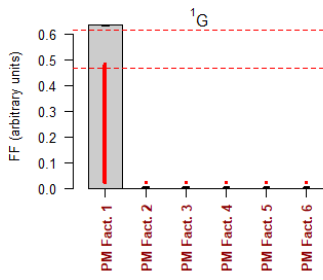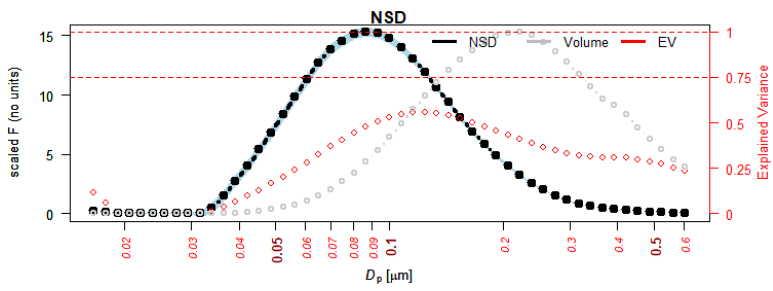

Diffuse Urban

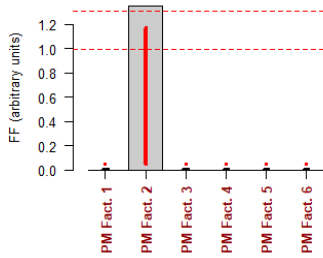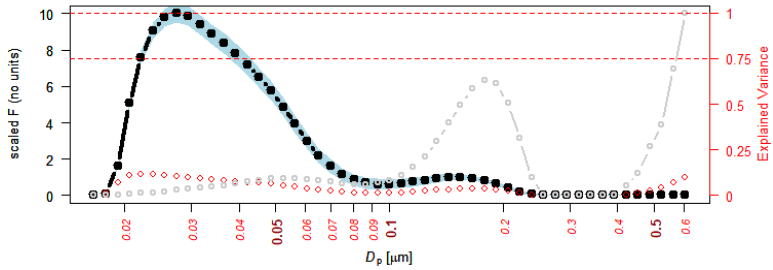

Marine

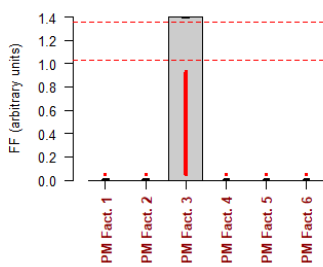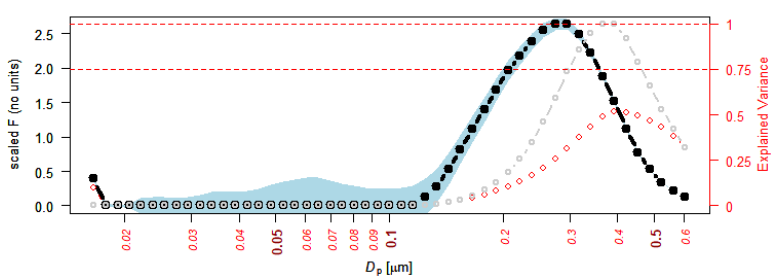

Secondary

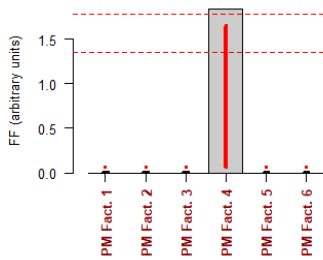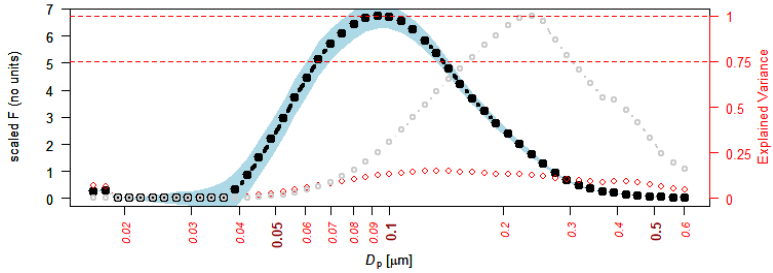

NET & Coarse

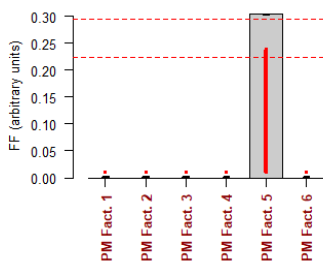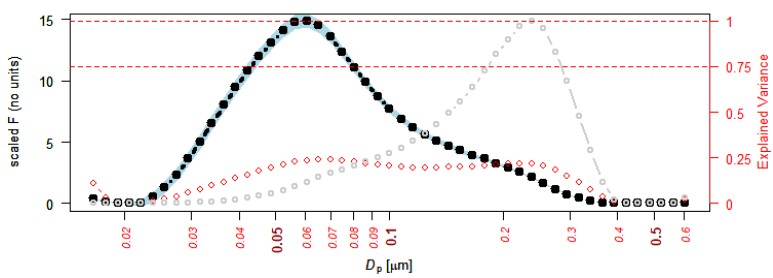

Fuel Oil

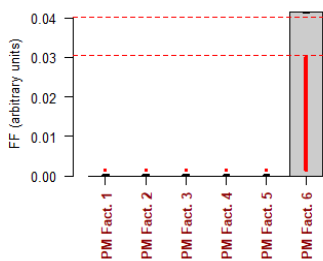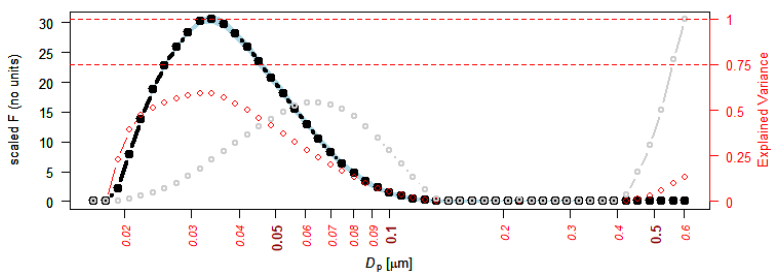

Traffic

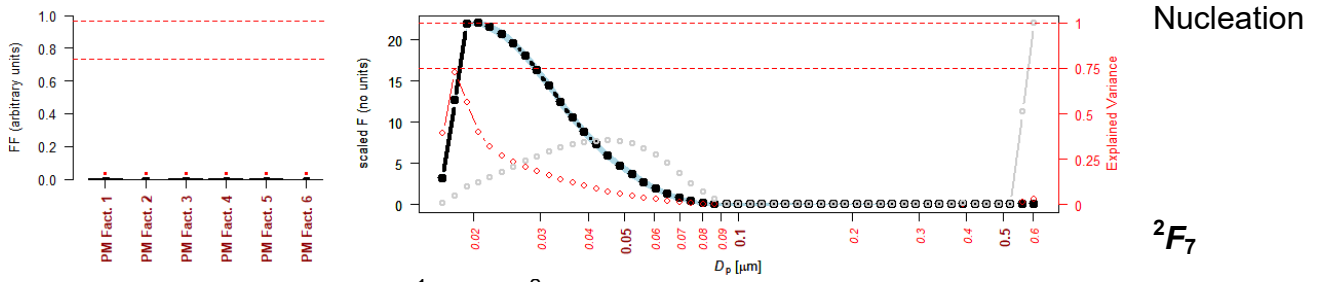

**Figure S3.** Source profiles  $^1F$  and  $^2F$  from both the first and second PMF step using 7 factors. [Grey bars and black line indicates the values of  $F$ ; red lines and dots indicated the explained variation; and grey dotted line indicates the  $dV/d\log D_p$  values.]

66  
67  
68  
69

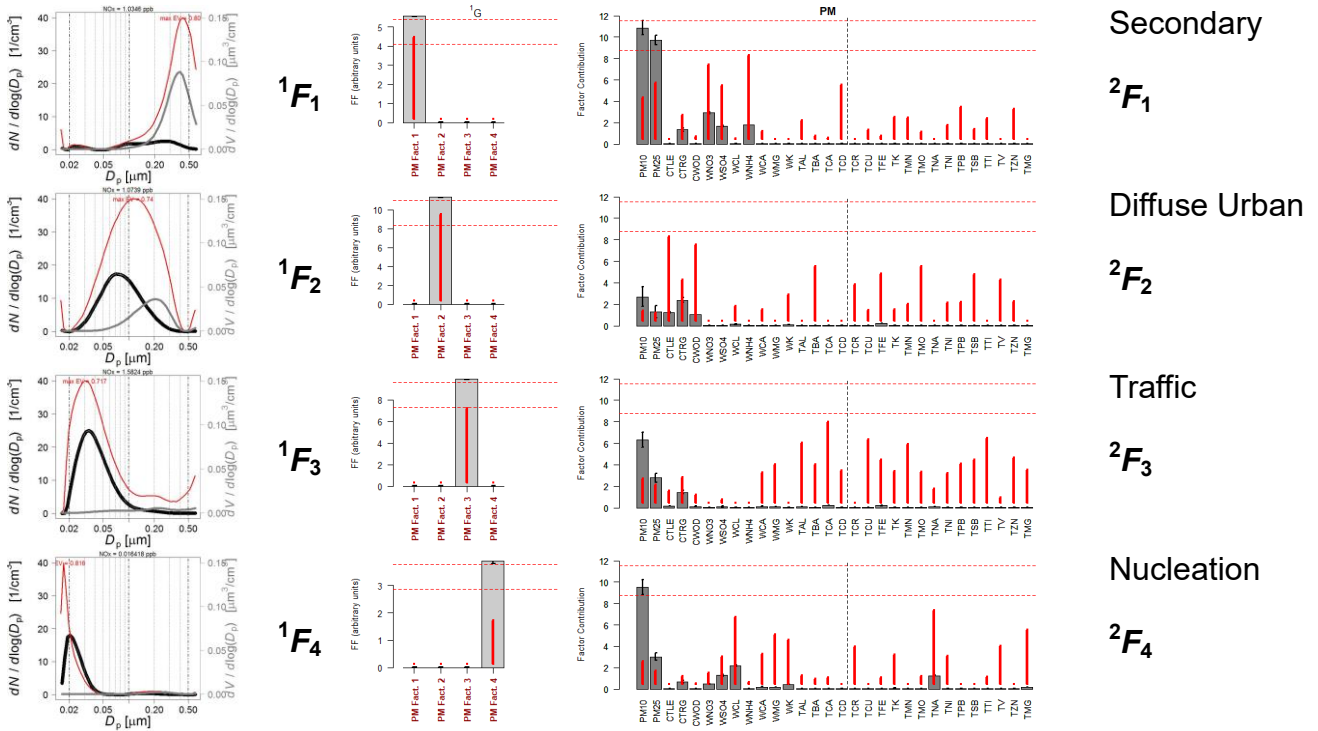

**Figure S4.** PMF-PMF 4 factor analysis of NSD data followed by  $PM_{10}$ . Each plot is divided into 2 showing the output  $^1F_k$  and  $^2F_k$ . [Grey bars and black line indicates the values of  $F$ ; red lines and dots indicated the explained variation; and grey dotted line indicates the  $dV/d\log D_p$  values.]

70
